# Supplementary material for: High quality graphene oxide–CdS–Pt nanocomposites for efficient photocatalytic hydrogen evolution
Source: Royal Society of Chemistry journal article supplement (doi:10.1039/c2jm15624e), 2011-12-20
Supplement: c2jm15624e.pdf [file c2jm15624e.pdf]

# High quality Graphene Oxide-CdS-Pt nanocomposites for efficient photocatalytic hydrogen evolution

Peng Gao, Jincheng Liu,\* Siewsiang Lee, Tong Zhang, and Darren Delai Sun\*

School of Civil and Environmental Engineering, Nanyang Technological University, Singapore 639798. Email:

JCLIU@ntu.edu.sg; DDSUN@ntu.edu.sg;

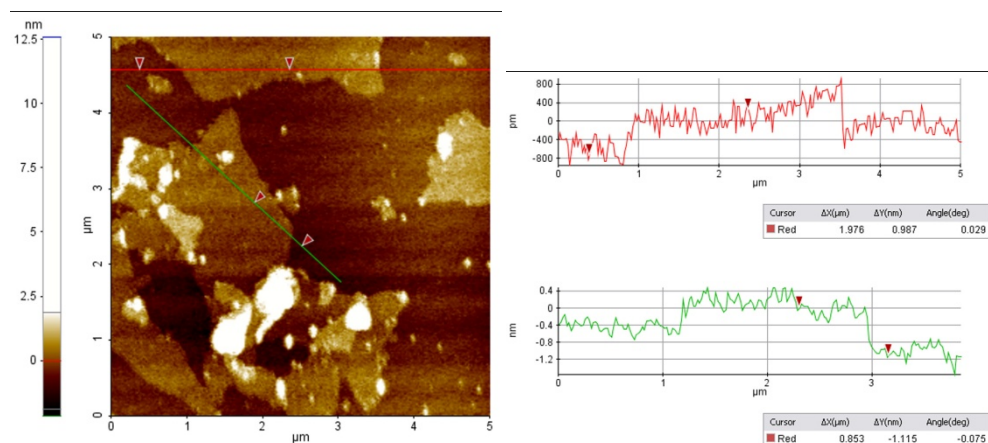

**Figure S1.** AFM image of GO sheet with two line scan indicating the average thickness of single layer GO is ca. 1 nm.

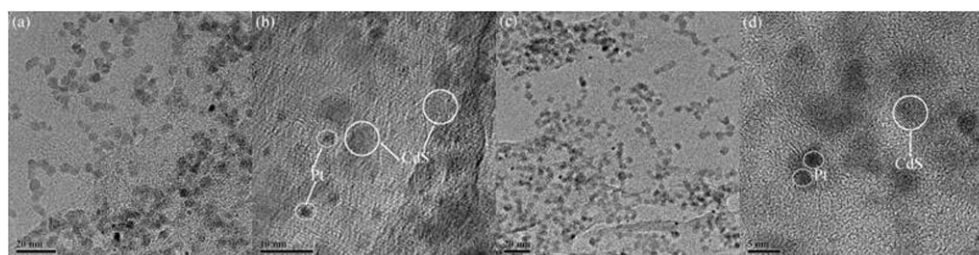

**Figure S2.** TEM and HRTEM images of GCP-1 (a-b) and GCP-2 (c-d).

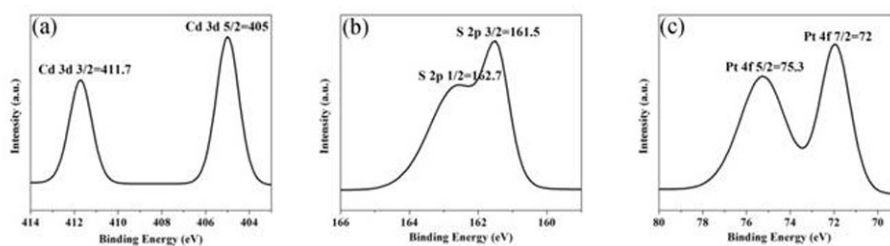

**Figure S3.** High-resolution XPS spectra of Cd 3d (a), S 2p (b) and Pt 4f (c) from GCP-3, respectively.

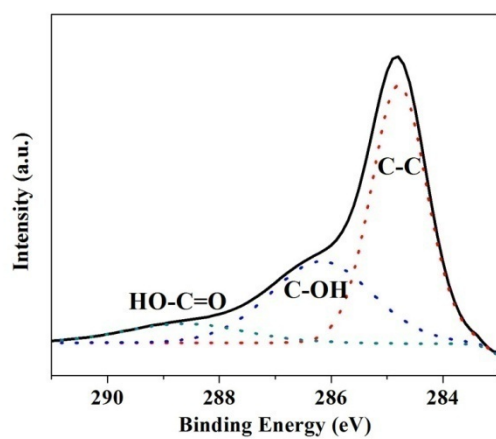

**Figure S4.** High-resolution XPS spectrum of C 1s from GCP-3 after hydrogen evolution process.
